# Supplementary material for: Validity and reliability of the Spanish version of the Organizational Readiness for Knowledge Translation (OR4KT) questionnaire
Source: Springer Nature journal article supplement (doi:10.1186/s13012-017-0664-y), 2017-11-10

# Predisposición organizacional a la transferencia del conocimiento para el cambio de práctica clínica

¡¡Recuerda!! Para contestar a este cuestionario debes pensar en el cambio, intervención, nuevas prácticas etc. en el contexto de la innovación para promover hábitos de vida saludables (actividad física, abandono del tabaco, consumo moderado de alcohol y dieta equilibrada).

Utilizando esta escala de cinco puntos, valora tu centro de salud en relación con cada una de las afirmaciones siguientes:

1 = Totalmente en desacuerdo; 2 = En desacuerdo; 3 = Neutro; 4 = De acuerdo; 5 = Totalmente de acuerdo

| 1. Clima organizacional para el cambio                                                                    |                          |                          |                          |                          |                          |
|-----------------------------------------------------------------------------------------------------------|--------------------------|--------------------------|--------------------------|--------------------------|--------------------------|
| En tu centro de salud                                                                                     | 1                        | 2                        | 3                        | 4                        | 5                        |
| 1. los profesionales trabajan en equipo                                                                   | <input type="checkbox"/> | <input type="checkbox"/> | <input type="checkbox"/> | <input type="checkbox"/> | <input type="checkbox"/> |
| 2. los profesionales están habitualmente pendientes de ayudarse entre si cuando se necesita               | <input type="checkbox"/> | <input type="checkbox"/> | <input type="checkbox"/> | <input type="checkbox"/> | <input type="checkbox"/> |
| 3. la confianza mutua entre los profesionales es fuerte                                                   | <input type="checkbox"/> | <input type="checkbox"/> | <input type="checkbox"/> | <input type="checkbox"/> | <input type="checkbox"/> |
| 4. la sobrecarga de trabajo reduce la efectividad de las intervenciones                                   | <input type="checkbox"/> | <input type="checkbox"/> | <input type="checkbox"/> | <input type="checkbox"/> | <input type="checkbox"/> |
| 5. la frustración de los profesionales es frecuente                                                       | <input type="checkbox"/> | <input type="checkbox"/> | <input type="checkbox"/> | <input type="checkbox"/> | <input type="checkbox"/> |
| 6. las ideas y sugerencias de los profesionales reciben la debida consideración por parte de la dirección | <input type="checkbox"/> | <input type="checkbox"/> | <input type="checkbox"/> | <input type="checkbox"/> | <input type="checkbox"/> |
| 7. los canales de comunicación formales funcionan muy bien                                                | <input type="checkbox"/> | <input type="checkbox"/> | <input type="checkbox"/> | <input type="checkbox"/> | <input type="checkbox"/> |
| 8. los profesionales se sienten libres para formular preguntas y expresar sus preocupaciones              | <input type="checkbox"/> | <input type="checkbox"/> | <input type="checkbox"/> | <input type="checkbox"/> | <input type="checkbox"/> |
| 9. la dirección de comarca está abierta a las ideas de los profesionales para propiciar los cambios       | <input type="checkbox"/> | <input type="checkbox"/> | <input type="checkbox"/> | <input type="checkbox"/> | <input type="checkbox"/> |
| 10. la dirección de comarca favorece prácticas nuevas y diferentes                                        | <input type="checkbox"/> | <input type="checkbox"/> | <input type="checkbox"/> | <input type="checkbox"/> | <input type="checkbox"/> |

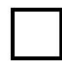

**¡¡Recuerda!! Para contestar a este cuestionario debes pensar en el cambio, intervención, nuevas prácticas etc. en el contexto de la innovación para promover hábitos de vida saludables (aumento actividad física, abandono del tabaco, consumo moderado de alcohol y dieta equilibrada).**

Utilizando esta escala de cinco puntos, valora tu centro de salud en relación con cada una de las afirmaciones siguientes:

**1 = Totalmente en desacuerdo; 2 = En desacuerdo; 3 = Neutro; 4 = De acuerdo; 5 = Totalmente de acuerdo**

| <b>2. Factores contextuales y organizacionales</b>                                                                                 |                          |                          |                          |                          |                          |
|------------------------------------------------------------------------------------------------------------------------------------|--------------------------|--------------------------|--------------------------|--------------------------|--------------------------|
| <b>Tu centro de salud</b>                                                                                                          | <b>1</b>                 | <b>2</b>                 | <b>3</b>                 | <b>4</b>                 | <b>5</b>                 |
| 11. tiene capacidad de determinar roles y responsabilidades para realizar un cambio en las prácticas preventivas                   | <input type="checkbox"/> | <input type="checkbox"/> | <input type="checkbox"/> | <input type="checkbox"/> | <input type="checkbox"/> |
| 12. tiene el apoyo necesario en términos de presupuesto o recursos económicos para realizar un cambio en las prácticas preventivas | <input type="checkbox"/> | <input type="checkbox"/> | <input type="checkbox"/> | <input type="checkbox"/> | <input type="checkbox"/> |
| 13. tiene el apoyo necesario en términos de formación                                                                              | <input type="checkbox"/> | <input type="checkbox"/> | <input type="checkbox"/> | <input type="checkbox"/> | <input type="checkbox"/> |
| 14. tiene el apoyo necesario en términos de instalaciones y equipamiento                                                           | <input type="checkbox"/> | <input type="checkbox"/> | <input type="checkbox"/> | <input type="checkbox"/> | <input type="checkbox"/> |
| 15. tiene el apoyo necesario en cuanto a la dotación de personal                                                                   | <input type="checkbox"/> | <input type="checkbox"/> | <input type="checkbox"/> | <input type="checkbox"/> | <input type="checkbox"/> |
| <b>En tu centro de salud</b>                                                                                                       | <b>1</b>                 | <b>2</b>                 | <b>3</b>                 | <b>4</b>                 | <b>5</b>                 |
| 16. la dirección de comarca solicita las opiniones del personal clínico en la toma de decisiones sobre la atención al paciente     | <input type="checkbox"/> | <input type="checkbox"/> | <input type="checkbox"/> | <input type="checkbox"/> | <input type="checkbox"/> |
| 17. los profesionales tienen sentido de responsabilidad profesional para mejorar la atención al paciente y los resultados          | <input type="checkbox"/> | <input type="checkbox"/> | <input type="checkbox"/> | <input type="checkbox"/> | <input type="checkbox"/> |
| 18. los profesionales cooperan para mantener y mejorar la eficacia en la atención al paciente                                      | <input type="checkbox"/> | <input type="checkbox"/> | <input type="checkbox"/> | <input type="checkbox"/> | <input type="checkbox"/> |
| 19. los profesionales están dispuestos a innovar y/o experimentar para mejorar los procedimientos clínicos                         | <input type="checkbox"/> | <input type="checkbox"/> | <input type="checkbox"/> | <input type="checkbox"/> | <input type="checkbox"/> |
| 20. los profesionales son receptivos al cambio en los procesos clínicos                                                            | <input type="checkbox"/> | <input type="checkbox"/> | <input type="checkbox"/> | <input type="checkbox"/> | <input type="checkbox"/> |

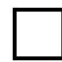

**¡¡Recuerda!! Para contestar a este cuestionario debes pensar en el cambio, intervención, nuevas prácticas etc. en el contexto de la innovación para promover hábitos de vida saludables (aumento actividad física, abandono del tabaco, consumo moderado de alcohol y dieta equilibrada).**

Utilizando esta escala de cinco puntos, valora tu centro de salud en relación con cada una de las afirmaciones siguientes:

**1 = Totalmente en desacuerdo; 2 = En desacuerdo; 3 = Neutro; 4 = De acuerdo; 5 = Totalmente de acuerdo**

**1 = Totalmente en desacuerdo; 2 = En desacuerdo; 3 = Neutro; 4 = De acuerdo; 5 = Totalmente de acuerdo**

### 3. Contenido del cambio

#### En tu centro de salud

|                                                                                                                                    | 1                        | 2                        | 3                        | 4                        | 5                        |
|------------------------------------------------------------------------------------------------------------------------------------|--------------------------|--------------------------|--------------------------|--------------------------|--------------------------|
| 21. existe voluntad para ajustarse a los cambios                                                                                   | <input type="checkbox"/> | <input type="checkbox"/> | <input type="checkbox"/> | <input type="checkbox"/> | <input type="checkbox"/> |
| 22. existe la capacidad para intercambiar ideas y tener impacto sobre las decisiones vinculadas a la atención al paciente          | <input type="checkbox"/> | <input type="checkbox"/> | <input type="checkbox"/> | <input type="checkbox"/> | <input type="checkbox"/> |
| 23. existe la flexibilidad necesaria para adaptarse al cambio                                                                      | <input type="checkbox"/> | <input type="checkbox"/> | <input type="checkbox"/> | <input type="checkbox"/> | <input type="checkbox"/> |
| 24. los profesionales están dispuestos a hacer ajustes en el trabajo habitual en respuesta a lo que está sucediendo a su alrededor | <input type="checkbox"/> | <input type="checkbox"/> | <input type="checkbox"/> | <input type="checkbox"/> | <input type="checkbox"/> |
| 25. generalmente, se pueden adaptar nuevas normas o procedimientos al trabajo habitual, incluso los que son impuestos              | <input type="checkbox"/> | <input type="checkbox"/> | <input type="checkbox"/> | <input type="checkbox"/> | <input type="checkbox"/> |
| 26. generalmente, los cambios propuestos han sido bien recibidos por parte de los pacientes                                        | <input type="checkbox"/> | <input type="checkbox"/> | <input type="checkbox"/> | <input type="checkbox"/> | <input type="checkbox"/> |
| 27. los cambios propuestos toman en consideración las necesidades y preferencias de los pacientes                                  | <input type="checkbox"/> | <input type="checkbox"/> | <input type="checkbox"/> | <input type="checkbox"/> | <input type="checkbox"/> |
| 28. los cambios propuestos parecen tener más ventajas que desventajas para los pacientes                                           | <input type="checkbox"/> | <input type="checkbox"/> | <input type="checkbox"/> | <input type="checkbox"/> | <input type="checkbox"/> |
| 29. los cambios propuestos deberían ser efectivos, basados en los conocimientos científicos actuales                               | <input type="checkbox"/> | <input type="checkbox"/> | <input type="checkbox"/> | <input type="checkbox"/> | <input type="checkbox"/> |

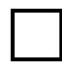

¡¡Recuerda!! Para contestar a este cuestionario debes pensar en el cambio, intervención, nuevas prácticas etc. en el contexto de la innovación para promover hábitos de vida saludables (aumento actividad física, abandono del tabaco, consumo moderado de alcohol y dieta equilibrada).

Utilizando esta escala de cinco puntos, valora tu centro de salud en relación con cada una de las afirmaciones siguientes:

1 = Totalmente en desacuerdo; 2 = En desacuerdo; 3 = Neutro; 4 = De acuerdo; 5 = Totalmente de acuerdo

| 4. Liderazgo                                                                                                                |                          |                          |                          |                          |                          |
|-----------------------------------------------------------------------------------------------------------------------------|--------------------------|--------------------------|--------------------------|--------------------------|--------------------------|
| En tu centro de salud                                                                                                       | 1                        | 2                        | 3                        | 4                        | 5                        |
| 30. la dirección de comarca ofrece una gestión eficaz para una mejora continua de la atención al paciente                   | <input type="checkbox"/> | <input type="checkbox"/> | <input type="checkbox"/> | <input type="checkbox"/> | <input type="checkbox"/> |
| 31. la dirección de comarca ofrece a los profesionales retroalimentación/datos sobre los efectos de las decisiones clínicas | <input type="checkbox"/> | <input type="checkbox"/> | <input type="checkbox"/> | <input type="checkbox"/> | <input type="checkbox"/> |
| 32. la dirección de comarca pide cuentas a los empleados de los resultados alcanzados                                       | <input type="checkbox"/> | <input type="checkbox"/> | <input type="checkbox"/> | <input type="checkbox"/> | <input type="checkbox"/> |
| 33. los agentes externos participan en el proceso de planificación                                                          | <input type="checkbox"/> | <input type="checkbox"/> | <input type="checkbox"/> | <input type="checkbox"/> | <input type="checkbox"/> |
| 34. generalmente, todos los empleados están involucrados en los procesos de toma de decisiones.                             | <input type="checkbox"/> | <input type="checkbox"/> | <input type="checkbox"/> | <input type="checkbox"/> | <input type="checkbox"/> |
| 35. hay un responsable de las decisiones de innovación entre los clínicos                                                   | <input type="checkbox"/> | <input type="checkbox"/> | <input type="checkbox"/> | <input type="checkbox"/> | <input type="checkbox"/> |
| 36. hay un responsable de las decisiones de innovación entre los administrativos                                            | <input type="checkbox"/> | <input type="checkbox"/> | <input type="checkbox"/> | <input type="checkbox"/> | <input type="checkbox"/> |
| 37. la dirección de comarca participa en los procesos de cambio                                                             | <input type="checkbox"/> | <input type="checkbox"/> | <input type="checkbox"/> | <input type="checkbox"/> | <input type="checkbox"/> |
| 38. los profesionales clínicos participan en los procesos de cambio                                                         | <input type="checkbox"/> | <input type="checkbox"/> | <input type="checkbox"/> | <input type="checkbox"/> | <input type="checkbox"/> |
| 39. el personal no clínico participa en los procesos de cambio                                                              | <input type="checkbox"/> | <input type="checkbox"/> | <input type="checkbox"/> | <input type="checkbox"/> | <input type="checkbox"/> |

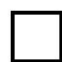

**¡¡Recuerda!! Para contestar a este cuestionario debes pensar en el cambio, intervención, nuevas prácticas etc. en el contexto de la innovación para promover hábitos de vida saludables (aumento actividad física, abandono del tabaco, consumo moderado de alcohol y dieta equilibrada).**

Utilizando esta escala de cinco puntos, valora tu centro de salud en relación con cada una de las afirmaciones siguientes:

**1 = Totalmente en desacuerdo; 2 = En desacuerdo; 3 = Neutro; 4 = De acuerdo; 5 = Totalmente de acuerdo**

| <b>5. Apoyo organizacional</b>                                                                                      |                          |                          |                          |                          |                          |
|---------------------------------------------------------------------------------------------------------------------|--------------------------|--------------------------|--------------------------|--------------------------|--------------------------|
| <b>En tu centro de salud</b>                                                                                        | <b>1</b>                 | <b>2</b>                 | <b>3</b>                 | <b>4</b>                 | <b>5</b>                 |
| 40. los miembros del equipo brindan apoyo real a las nuevas ideas y sus aplicaciones                                | <input type="checkbox"/> | <input type="checkbox"/> | <input type="checkbox"/> | <input type="checkbox"/> | <input type="checkbox"/> |
| 41. los miembros del equipo ponen fácil el desarrollo de nuevas ideas                                               | <input type="checkbox"/> | <input type="checkbox"/> | <input type="checkbox"/> | <input type="checkbox"/> | <input type="checkbox"/> |
| 42. los miembros del equipo cooperan para ayudar a desarrollar y aplicar nuevas ideas                               | <input type="checkbox"/> | <input type="checkbox"/> | <input type="checkbox"/> | <input type="checkbox"/> | <input type="checkbox"/> |
| 43. entre los miembros del equipo se comparten recursos para facilitar la aplicación de nuevas ideas                | <input type="checkbox"/> | <input type="checkbox"/> | <input type="checkbox"/> | <input type="checkbox"/> | <input type="checkbox"/> |
| 44. los procesos de cambio son monitorizados continuamente                                                          | <input type="checkbox"/> | <input type="checkbox"/> | <input type="checkbox"/> | <input type="checkbox"/> | <input type="checkbox"/> |
| 45. los resultados son monitorizados continuamente                                                                  | <input type="checkbox"/> | <input type="checkbox"/> | <input type="checkbox"/> | <input type="checkbox"/> | <input type="checkbox"/> |
| 46. la evaluación y la mejora de la implementación del cambio incluye mediciones periódicas de los resultados       | <input type="checkbox"/> | <input type="checkbox"/> | <input type="checkbox"/> | <input type="checkbox"/> | <input type="checkbox"/> |
| 47. la evaluación y la mejora de la implementación del cambio incluye un plan de divulgación de los resultados      | <input type="checkbox"/> | <input type="checkbox"/> | <input type="checkbox"/> | <input type="checkbox"/> | <input type="checkbox"/> |
| 48. la evaluación y la mejora de la implementación del cambio incluye la revisión de los resultados por los líderes | <input type="checkbox"/> | <input type="checkbox"/> | <input type="checkbox"/> | <input type="checkbox"/> | <input type="checkbox"/> |
| 49. hay mecanismos formales establecidos para recoger los comentarios relacionados con el cambio propuesto          | <input type="checkbox"/> | <input type="checkbox"/> | <input type="checkbox"/> | <input type="checkbox"/> | <input type="checkbox"/> |



**¡¡Recuerda!! Para contestar a este cuestionario debes pensar en el cambio, intervención, nuevas prácticas etc. en el contexto de la innovación para promover hábitos de vida saludables (aumento actividad física, abandono del tabaco, consumo moderado de alcohol y dieta equilibrada).**

Utilizando esta escala de cinco puntos, valora tu centro de salud en relación con cada una de las afirmaciones siguientes:

**1 = Totalmente en desacuerdo; 2 = En desacuerdo; 3 = Neutro; 4 = De acuerdo; 5 = Totalmente de acuerdo**

| 6. Motivación                                                                                                                                         |                          |                          |                          |                          |                          |
|-------------------------------------------------------------------------------------------------------------------------------------------------------|--------------------------|--------------------------|--------------------------|--------------------------|--------------------------|
| En tu centro de salud                                                                                                                                 | 1                        | 2                        | 3                        | 4                        | 5                        |
| 50. los pacientes presionan para que se realicen cambios en las prácticas preventivas                                                                 | <input type="checkbox"/> | <input type="checkbox"/> | <input type="checkbox"/> | <input type="checkbox"/> | <input type="checkbox"/> |
| 51. las presiones para realizar cambios en las prácticas preventivas provienen de los profesionales                                                   | <input type="checkbox"/> | <input type="checkbox"/> | <input type="checkbox"/> | <input type="checkbox"/> | <input type="checkbox"/> |
| 52. la dirección de comarca presiona para realizar cambios en las prácticas preventivas                                                               | <input type="checkbox"/> | <input type="checkbox"/> | <input type="checkbox"/> | <input type="checkbox"/> | <input type="checkbox"/> |
| 53. las presiones para realizar cambios en las prácticas preventivas provienen de Osakidetza                                                          | <input type="checkbox"/> | <input type="checkbox"/> | <input type="checkbox"/> | <input type="checkbox"/> | <input type="checkbox"/> |
| 54. el Departamento de Salud presiona para realizar cambios en las prácticas preventivas                                                              | <input type="checkbox"/> | <input type="checkbox"/> | <input type="checkbox"/> | <input type="checkbox"/> | <input type="checkbox"/> |
| 55. existe experiencia previa de implementación de cambios en las prácticas preventivas, obtenida de proyectos o programas pilotos y sus evaluaciones | <input type="checkbox"/> | <input type="checkbox"/> | <input type="checkbox"/> | <input type="checkbox"/> | <input type="checkbox"/> |
| 56. los directivos conocen la innovación gracias a su experiencia previa                                                                              | <input type="checkbox"/> | <input type="checkbox"/> | <input type="checkbox"/> | <input type="checkbox"/> | <input type="checkbox"/> |
| 57. se dispone de conocimientos sobre cómo están siendo utilizadas por otras organizaciones innovaciones similares en las prácticas preventivas       | <input type="checkbox"/> | <input type="checkbox"/> | <input type="checkbox"/> | <input type="checkbox"/> | <input type="checkbox"/> |
| 58. los directivos promueven el cambio comportándose de manera consistente con dicho cambio en las prácticas preventivas                              | <input type="checkbox"/> | <input type="checkbox"/> | <input type="checkbox"/> | <input type="checkbox"/> | <input type="checkbox"/> |
| 59. los directivos definen el curso del cambio en las prácticas preventivas                                                                           | <input type="checkbox"/> | <input type="checkbox"/> | <input type="checkbox"/> | <input type="checkbox"/> | <input type="checkbox"/> |
| Comentarios:                                                                                                                                          |                          |                          |                          |                          |                          |
| <input type="text"/>                                                                                                                                  |                          |                          |                          |                          |                          |



Supplement: MOESM1 [file 15213668]
